# Supplementary material for: Adoptive Transfer of MAGE-A4 T-cell Receptor Gene-Transduced Lymphocytes in Patients with Recurrent Esophageal Cancer
Source: Oxford University Press journal article supplement (doi:10.1158/1078-0432.ccr-14-1559), 2015-04-08
Supplement: 10780432ccr141559-sup-132541_3_supp_2856593_njjz2z.xlsx [file 10780432ccr141559-sup-132541_3_supp_2856593_njjz2z.xlsx]

## Sheet: Table S1
Table S1. Peptides which have homologue sequences with MAGE-A4143-151 peptide
Peptide	Amino acid sequences
MAGE-A9 p141	NYKRYFPVI
MAGE-A1 p135	NYKHCFPEI
Keratin-25 p129	DYSRYFPII
ATP-cassette p984	NTKRLNCFPV
MAGE-A8 p145	NYKNHFPDI
MAGE-C3iso2 p191	KYKDYFPMI
MAGE-A11 p255	NYEDYFPEI
MAGE-A4 p143	NYKRCFPVI
